# Supplementary material for: Seed-based IntaRNA prediction combined with GFP-reporter system identifies mRNA targets of the small RNA Yfr1
Source: PubMed Central journal article supplement — Bioinformatics. 2009 Oct 22;26(1):1–5. doi: 10.1093/bioinformatics/btp609 (PMC2796815; doi:10.1093/bioinformatics/btp609), 2009-10-22
Supplement: btp609_1.pdf [file btp609_1.pdf]

Supplementary Table 2. DNA oligonucleotides used in this study.

| Name                          | Sequence (5' to 3' direction)                                                 |
|-------------------------------|-------------------------------------------------------------------------------|
| Yfr1-MED4-FW-P                | ATGGGGGAAACCCCATCTCC                                                          |
| Yfr1-MED4-RV-XbaI             | CATATAAGTAACAAAACATCTAGAAAAAGCCC                                              |
| Yfr1_MED4_FW_P2               | ATGGGGGAAACCCCATCTGGTCACACACCAAAATCGCCCGATTTATCGGGCTTTTTTT                    |
| Yfr1_MED4_RV_2                | CTAGAAAAAAGCCCGATAAAATCGGGCGATTTGGTGTGTGACCAGTATGGGGTTTCCCCCAT                |
| Yfr1_MED4_FW_P3               | ATGGGGGAAACCCCATACAAAACACACACCAAAATCGCCCGATTTATCGGGCTTTTTTT                   |
| Yfr1_MED4_RV_3                | CTAGAAAAAAGCCCGATAAAATCGGGCGATTTGGTGTGTGTTTTGTATGGGGTTTCCCCCAT                |
| PMM0494-MED4-RV-NheI          | TCTACTTGGGGGGCTAGCAAGGTTTGC                                                   |
| PMM0494-MED4-FW-Mph1103I      | GAACTAACATCAAAGTATGCATTTAATCATTGAG                                            |
| PMM1119-MED4-FW-Mph1103I-NheI | TATTGTGTGAGGATTTTTATGAAGCTTTTTAAAG                                            |
| PMM1119-MED4-RV-Mph1103I-NheI | CTAGCTTTAAAAAGCTTCATAAAAAATCCTCACACAATATGCA                                   |
| PMM1121-MED4-FW-Mph1103I-NheI | TAATATTGTGTGAGGCAATTTATGAAGCTTTTCG                                            |
| PMM1121-MED4-RV-Mph1103I-NheI | CTAGCGAAAAGCTTCATAAAATGCTCACACAATATGCA                                        |
| PMM1697-MED4-FW-Mph1103I-NheI | TCTTAAAGAGGCCAGGGTGTGGGGATCCTTCTGGAAG                                         |
| PMM1697-MED4-RV-Mph1103I-NheI | CTAGCTTCCAGAAGGATCCCCATCACCCTGGCCTCTTAAAGATGCA                                |
| PMM0050-MED4-FW-Mph1103I-NheI | TATAAAAAAGATTGATTCAGCTTGAGACTAATTGGTCATTTGTGAGTGATGGTGAAGAAAAGCCTG            |
| PMM0050-MED4-RV-Mph1103I-NheI | CTAGCAGGCTTTTCTTACCATCACTCACAAATGACCAATTAGTCTCAAGCTGAATCAATCTTTTTTATA<br>TGCA |
| PMM0538-MED4-FW-Mph1103I-NheI | TAAATATAACGGAGATTATTTTTGAGGAGTTTGCAAATTTTTAAAGTAAAGG                          |
| PMM0538-MED4-RV-Mph1103I-NheI | CTAGCCTTTACTTTAAAAATTTGCAAACCTCTCAAAAAATAATCTCCGTTATATTTA                     |
